# Supplementary material for: Sub-nanosecond tryptophan radical deprotonation mediated by a protein-bound water cluster in class II DNA photolyases
Source: PubMed Central journal article supplement (PMC5885780; doi:10.1039/c7sc03969g), 2017-12-11
Supplement: SC-009-C7SC03969G-s001.pdf [file SC-009-C7SC03969G-s001.pdf]

## Electronic Supplementary Information

### Sub-nanosecond tryptophan radical deprotonation mediated by a protein-bound water cluster in class II DNA photolyases

Pavel Müller,<sup>\*†a</sup> Elisabeth Ignatz,<sup>‡b</sup> Stephan Kiontke,<sup>¶b</sup> Klaus Brettel<sup>a</sup> and Lars-Oliver Essen<sup>\*b</sup>

<sup>a</sup> Institute for Integrative Biology of the Cell (I2BC), CEA, CNRS, Univ. Paris-Sud, Université Paris-Saclay, 91198, Gif-sur-Yvette cedex, France. \*E-mail: [pavel.muller@i2bc.paris-saclay.fr](mailto:pavel.muller@i2bc.paris-saclay.fr)

<sup>b</sup> Department of Chemistry, LOEWE Center for Synthetic Microbiology, Philipps University, 35032 Marburg, Germany. \*E-mail: [essen@chemie.uni-marburg.de](mailto:essen@chemie.uni-marburg.de)

<sup>¶</sup> Present address: Structural Biology, FB5 Biology/Chemistry, University of Osnabrück, 49076 Osnabrück, Germany.

<sup>‡</sup> The authors contributed equally to this work.

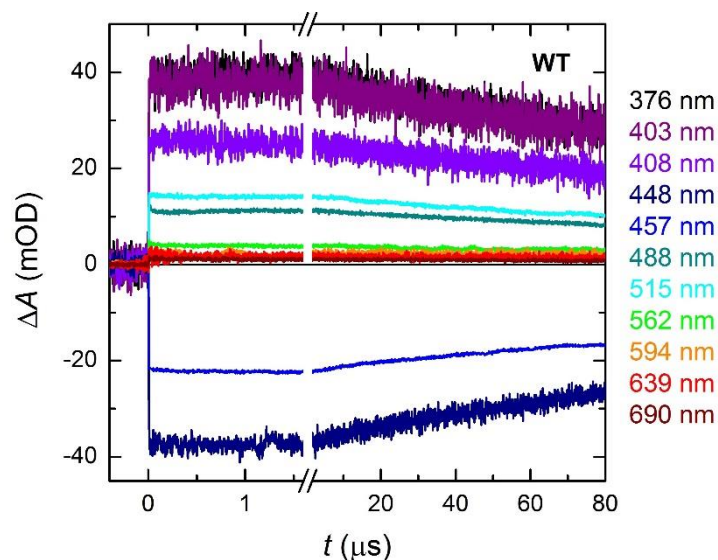

**Fig. S1** Flash-induced absorption changes on a ns/ $\mu s$  time scale for WT *MmCPDII* at all measured wavelengths. Experimental conditions are described in the legend of Fig. 3.

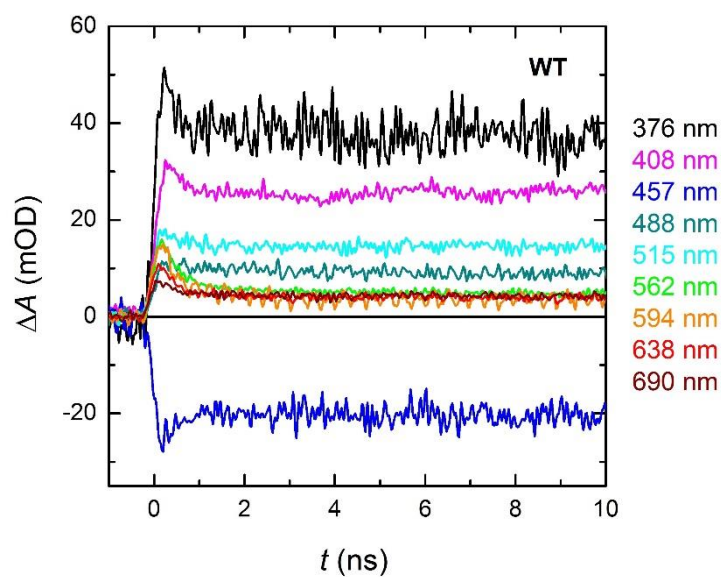

**Fig. S2** Flash-induced absorption changes on a ps/ns time scale for WT *MmCPDII* at all measured wavelengths. Experimental conditions are described in the legend of Fig. 4.

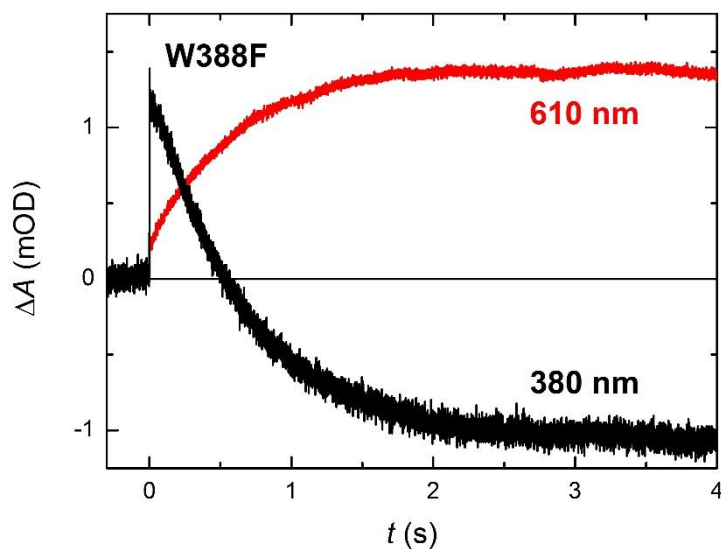

**Fig. S3** Flash-induced absorption changes on a seconds time scale for 20.9  $\mu\text{M}$  W388F mutant *MmCPDII* (in the presence of 10 mM cysteine) reflecting the slow (630 ms) protonation of  $\text{FAD}^{\cdot-}$  to  $\text{FADH}^{\cdot}$ . The sample was excited at 470 nm by a 5 ns pulse of  $E \sim 10.0$  mJ per  $\text{cm}^2$ . The signals are averages of three single-flash experiments spaced by  $\sim 1$  minute.

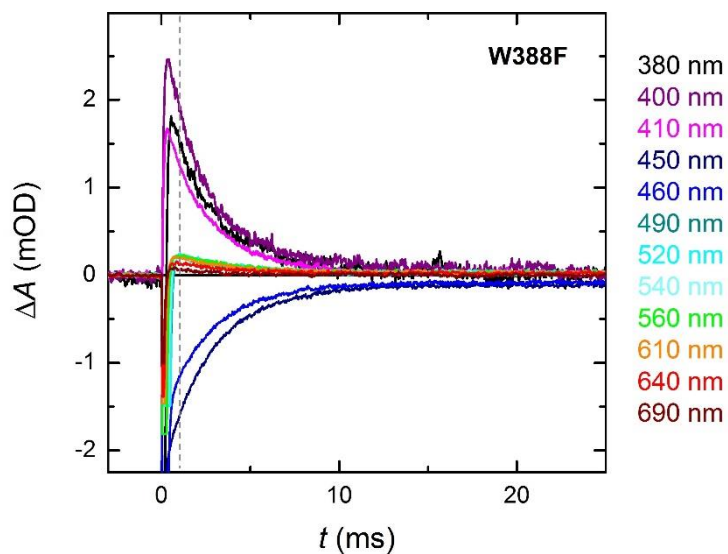

**Fig. S4** Flash-induced absorption changes on a ms time scale for W388F mutant *MmCPDII* at all measured wavelengths. Experimental conditions are described in the legend of Fig. 10.

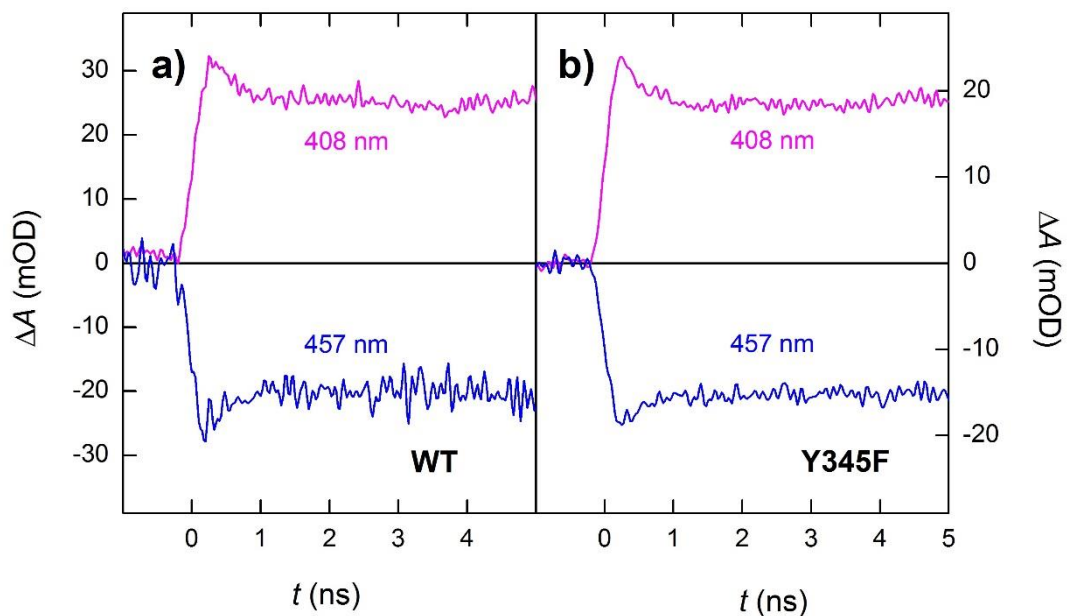

**Fig. S5** Comparison of the flash-induced absorption changes on a ps/ns time scale for a) WT *MmCPDII* (64  $\mu\text{M}$ ) and b) its Y345F mutant (69  $\mu\text{M}$ ). The samples were excited at 355 nm by 100 ps pulses of  $E \sim 5$  mJ per  $\text{cm}^2$  (WT) or  $\sim 4$  mJ per  $\text{cm}^2$  (Y345F).

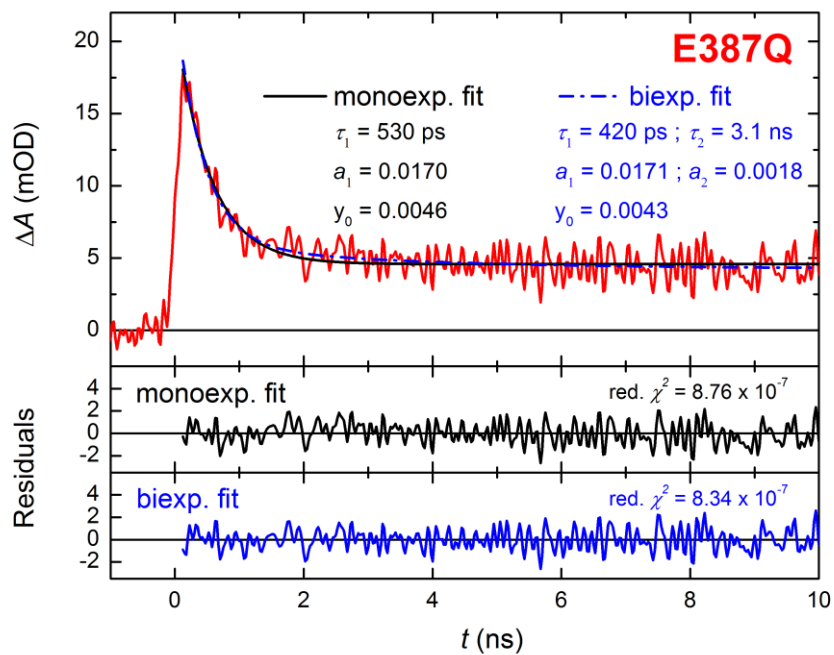

**Fig. S6** Comparison of mono- and biexponential fits of the flash-induced absorption changes at 562 nm in E387Q *MmCPDII* (identical to the signal shown in Fig. 11 of the main text). Fit functions:  $\Delta A(t) = a_1 e^{-\frac{t}{\tau_1}} + y_0$  (black solid line) and  $\Delta A(t) = a_1 e^{-\frac{t}{\tau_1}} + a_2 e^{-\frac{t}{\tau_2}} + y_0$  (blue dashed line).

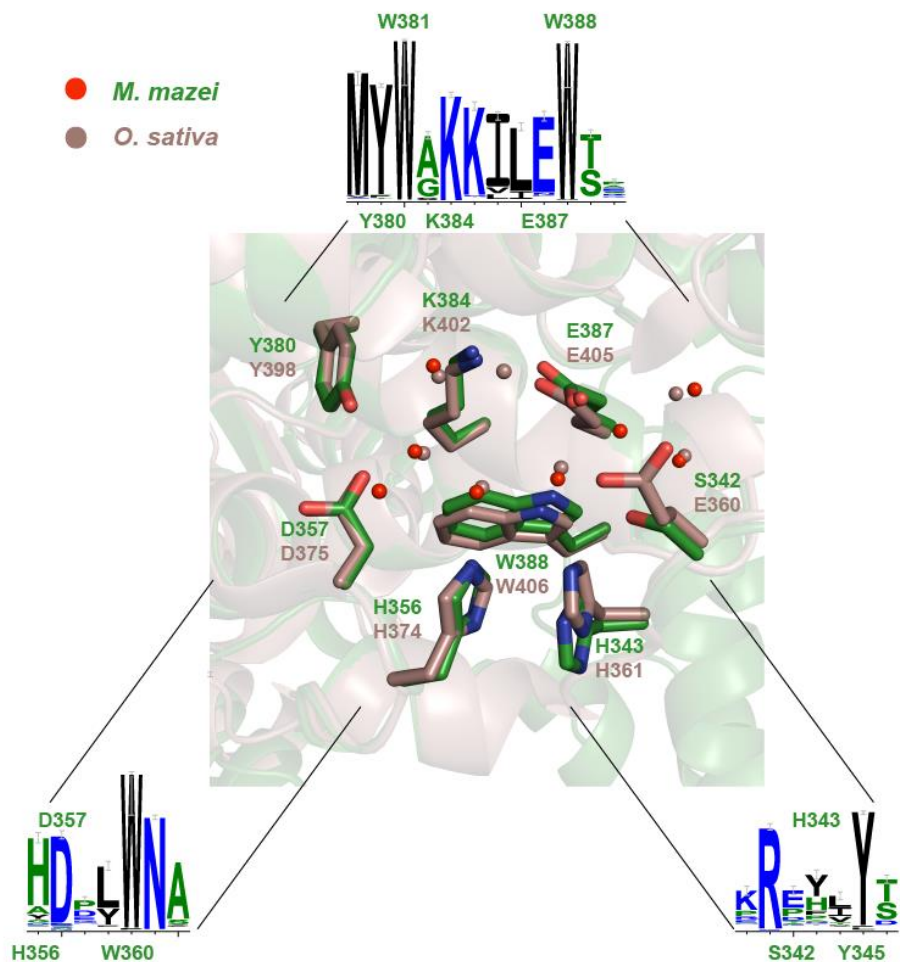

**Fig. S7** The immediate environment of the terminal tryptophan and the water network participating in its deprotonation during photoactivation: superposition of two crystal structures of class II CPD photolyases from the archaeon *Methanosarcina mazei* (PDB entry 2XRZ)<sup>1</sup> and the plant *Oryza sativa* (PDB entry 3UMV)<sup>2</sup>. The degree of conservation of the individual amino acids determined from 451 non-redundant class II photolyase sequences is proportional to the height of the corresponding symbols (W360, W381 and W388 are strictly conserved).

**Determination of intrinsic rate/time constants of FAD<sup>•-</sup> Trp<sub>388</sub><sup>•</sup> recombination, competing ET from Tyr<sub>345</sub> to Trp<sub>388</sub><sup>•</sup> and FAD<sup>•-</sup> Tyr<sub>345</sub><sup>•</sup> recombination for the Scheme 1 in the main text**

To describe the reaction kinetics following the formation of FAD<sup>•-</sup> Trp<sub>388</sub><sup>•</sup>, we used the following simplified scheme neglecting the very low population of FAD<sup>•-</sup> Trp<sub>388</sub>H<sup>•+</sup> in protonation equilibrium with Trp<sub>388</sub><sup>•</sup>):

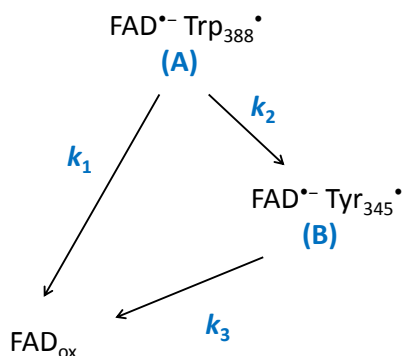

**Scheme S1**

Scheme S1 is described by two coupled differential equations:

$$\frac{d[A]}{dt} = -(k_1 + k_2)[A] \quad (1) \quad \frac{d[B]}{dt} = k_2[A] - k_3[B]. \quad (2)$$

Initially, only the state A is populated, *i.e.*,  $[A](t=0) = [A]_0 = 1$  and  $[B](t=0) = 0$ .

Solving these equations for [A] and [B] gives:

$$[A](t) = [A]_0 e^{-(k_1+k_2)t} \quad (3)$$

$$[B](t) = [A]_0 \frac{k_2}{k_1+k_2-k_3} (e^{-k_3 t} - e^{-(k_1+k_2)t}) \quad (4)$$

Using for the absorption change

$$\Delta A(t) = (\Delta \varepsilon_A [A](t) + \Delta \varepsilon_B [B](t))d, \quad (5)$$

where  $d$  is the optical path length, one obtains

$$\Delta A(t) = a_1 e^{-(k_1+k_2)t} + a_2 e^{-k_3 t} \quad (6)$$

with

$$a_1 = \left( \Delta \varepsilon_A - \Delta \varepsilon_B \frac{k_2}{k_1+k_2-k_3} \right) [A]_0 d \quad \text{and} \quad a_2 = \frac{k_2}{k_1+k_2-k_3} \Delta \varepsilon_B [A]_0 d.$$

$$\frac{a_1}{a_2} = \frac{k_1+k_2-k_3}{k_2} \frac{\Delta \varepsilon_A}{\Delta \varepsilon_B} - 1 \quad (7)$$

Eq. 6 consists of two terms corresponding to the two fitted phases. The pre-exponential factors reflect the relative amplitudes ( $a_1$  and  $a_2$ ) of the respective phases, the rates of the phases are described by the constants in the exponents: the sum  $(k_1 + k_2)$  determines the fast phase (disappearance of A and

the concomitant formation of B) and  $k_3$  determines the slow phase (disappearance of B). The sum ( $k_1 + k_2$ ) and  $k_3$  and are obtained directly from the fit:  $k_1 + k_2 = 4444 \text{ s}^{-1}$  ( $1/225 \times 10^{-6} \text{ s}$ ) and  $k_3 = 909 \text{ s}^{-1}$  ( $1/1.1 \times 10^{-3} \text{ s}$ ), respectively.

To obtain  $k_1$  and  $k_2$  individually, we additionally used the amplitude ratio  $a_1/a_2 = 7/3$  observed at 450 nm, where the  $\text{FAD}^*/\text{FAD}_{\text{ox}}$  contribution largely prevails over those of  $\text{Trp}^*/\text{TrpH}$  and  $\text{Tyr}^*/\text{TyrH}$  (Fig. 2).

Using eq. 7 with  $\Delta\varepsilon_A/\Delta\varepsilon_B = 0.923$  (Fig. 2), one obtains:

$$k_2 = \frac{(k_1 + k_2 - k_3) \frac{\Delta\varepsilon_A}{\Delta\varepsilon_B}}{\frac{a_1}{a_2} + 1} = \frac{(4444 - 909) 0.923}{\frac{7}{3} + 1} \text{ s}^{-1} = 979 \text{ s}^{-1}$$

$$k_1 = (4444 - 979) \text{ s}^{-1} = 3465 \text{ s}^{-1}$$

The intrinsic rate constants  $k_1$ ,  $k_2$  and  $k_3$  convert into time constants  $\tau_1$ ,  $\tau_2$  and  $\tau_3$  of  $\sim 300 \mu\text{s}$ ,  $\sim 1 \text{ ms}$  and  $1.1 \text{ ms}$ , respectively, which are indicated in the **Scheme 1** of the main text.

---

## References

1. S. Kiontke, Y. Geisselbrecht, R. Pokorny, T. Carell, A. Batschauer and L.-O. Essen, *EMBO J.*, 2011, **30**, 4437-4449.
2. K. Hitomi, A. S. Arvai, J. Yamamoto, C. Hitomi, M. Teranishi, T. Hirouchi, K. Yamamoto, S. Iwai, J. A. Tainer, J. Hidema and E. D. Getzoff, *J. Biol. Chem.*, 2012, **287**, 12060-12069.
